1 **Association between altitude and death from COVID-19 in subjects with diabetes mellitus**  
2 **during the first wave: cross sectional study of the National Death Index**

3

4 **Short title:** Association between altitude and death from COVID-19 in diabetics.

5

6 Raúl Manuel Ambrosio-Ojose <sup>1</sup> . Cesar Josué Casquero-Zambrano <sup>1</sup> . Tery Vasquez-Hassinger <sup>1</sup>

7 Marlon Yovera-Aldana <sup>2\*</sup>

8

9 <sup>1</sup> Carrera de Medicina Humana, Facultad de Ciencias de la Salud, Universidad Científica del  
10 Sur, Humana, Lima, Perú

11 <sup>2</sup> Grupo de Investigación en Neurociencias, Efectividad Clínica y Salud Pública, Universidad  
12 Científica del Sur, Lima, Perú.

13

14 **\* Corresponding author**

15 Marlon Yovera-Aldana E-mail: [myovera@cientifica.edu.pe](mailto:myovera@cientifica.edu.pe) (MYA)

16

## 17 ABSTRACT

18 **Background.** In high Andean areas, there is greater insulin sensitivity which may be a protective  
19 factor against complications in subjects with diabetes mellitus.

20 **Objective:** Determine the association between altitude of residence and death from COVID-19  
21 in deaths with diabetes mellitus in Peru during the first wave..

22 **Methods:** We carried out a cross-sectional analysis of deaths registered in the National Death  
23 System of Peru (SINADEF in Spanish). We selected Peruvians with diabetes mellitus identified  
24 by presenting the diagnosis in any of the six boxes on the certificate. The dependent variable was  
25 death from COVID-19 as the basic cause of death, located in last place among causes A, B, C and  
26 D according to the Pan American Health Organization. The independent variable was the altitude  
27 of residence, categorized as less than 1 500 m a.s.l, 1 500 to 2 499 m a.s.l. and greater than 2 500  
28 m a.s.l. Through a multilevel analysis by geographic region and using a Poisson regression, we  
29 obtained the risk ratios of death from COVID-19 according to the altitude of residence. We  
30 adjusted by individual and contextual variables.

31 **Results:** We included 16 406 deaths with diabetes mellitus between March-December 2020.  
32 34.3% died from Covid19 and 9.7% came from areas above 2 500 m. The proportion of deaths  
33 from COVID-19 of those with residence altitude above 2 500 m was 20% lower compared to  
34 residents below 1 500 m (RR: 0.80; 95% CI: 0.70 – 0.91;  $p < 0.001$ ), adjusted for individual and  
35 socioeconomic factors. Its influence is also shown as the altitude changes every 100, 250, 500  
36 and 1000 m a.s.l., through multilevel analysis.

37 **Conclusion:** A higher altitude of residence is associated with a lower proportion of deaths from  
38 COVID-19 in people with diabetes mellitus during the first wave in Peru. The study contribute to  
39 expanding knowledge of the effects of altitude with respect to mortality in people with diabetes  
40 mellitus in a context of a highly contagious and virulent infectious disease.

41 **Keywords (MESH):** COVID-19; Mortality; diabetes mellitus; Altitude; Peru; risk

## 43 Introduction

44 Peru presented the highest mortality rate from COVID-19 worldwide during the first wave in  
45 2020. Reaching a rate of more than 70 per 100 000[1] and an excess of deaths of 103% compared  
46 to 2019 [2]. Fragmented health system with limited budget and inefficient primary care, despite  
47 prolonged confinement, led to these serious outcomes[3] .

48 One of the factors associated with mortality from SARS-Cov-2 is type 2 diabetes mellitus (DM).  
49 About 45% of patients with SARS-CoV-2 presented DM at the beginning of the first wave  
50 worldwide.[4] It also increases mortality by 0.8 times compared to people without diabetes [5].  
51 An overexpression of angiotensin converting enzyme (ACE) receptor has been discovered on beta  
52 cells in the pancreas of subjects with DM This would cause a greater entry of the virus, cell  
53 damage and a potential crisis of hyperglycemia that initiates the cascade of acute complications.  
54 [6].

55 In the middle of the first wave, it was postulated that SARS-CoV-2 disease was less prevalent at  
56 higher altitudes [7]. In others Latin American countries, altitude also was associated with decrease  
57 in morbidity and mortality from COVID-19 [8] A lower expression of ACE is due to chronic  
58 hypoxia which causes a lower viral load and a decrease in systemic inflammation [9]. Thus, the  
59 impact of altitude on the cause of death is controversial [10,11]. However, in high Andean areas,  
60 there is greater insulin sensitivity and a lower prevalence of diabetes mellitus, which may be a  
61 protective factor against complications. [12]

62 Considering that Peru had one of the highest percentages of people living above 2 500 m and one  
63 of the highest incidences of diabetes in the world [13] .We aimed to evaluate the association  
64 between altitude of residence and death from COVID-19 in deceased Peruvians with DM using  
65 data from the National System of Deaths from March to December 2020.

66

67

## 68 **Materials and methods**

### 69 **Study design**

70 We conducted a cross-sectional study of data from the National System of Deaths of Peru  
71 (SINADEF, initials in Spanish) of the Government of Peru. SINADEF registers the characteristics  
72 and cause of death of all Peruvians in national territory and abroad since 2015. Online registration  
73 is carried out by any Peruvian doctor and is essential for death certification. The analysis period  
74 ranged from March 1 to December 31, 2020.

### 75 **Population**

76 We included subjects with diabetes mellitus, without specifying the type of diabetes. It could be  
77 like cause of death or comorbidity. ICD-10 code for diabetes mellitus must be in any of the six  
78 available boxes on the death certificate. Codes used are in the Supplementary Table 1. Likewise,  
79 we excluded Peruvians who died abroad, incomplete data or unclear cause of death.

### 80 **Variables**

#### 81 **Death due to COVID 19**

82 We defined cause of death as COVID 19, if it was present as the underlying cause on the death  
83 certificate. [14] Later called the SINADEF criterion and did not require confirmatory tests or  
84 symptoms. [15] The Peruvian death certificate, according to guideline of the 10/100 list of the  
85 Pan American Health Organization, establishes three causes of death: direct, intermediate and  
86 basic. The basic cause of death is defined as that which initiates the chain of pathological events  
87 that led directly to death. Which is located in last place among causes A, B, C and D. [16] The  
88 ICD-10 codes used were (U07.1) for confirmed disease and (U07.2) for probable disease.  
89 Likewise, B34X and B97X codes and records without ICD-10 but written diagnosis such as  
90 "SARS CoV-2", "COVID-19" or "coronavirus" were classified as "other codes [17].

91 The underlying cause was reclassified as infectious, noncommunicable, external injury, and  
92 undetermined. The ICD-10 codes that make up each of these categories can be seen in the  
93 *Supplementary Table 2*.

#### 94 **Altitude of residence and other variables**

95 Altitude was classified as less than 1500 m, between 1500 and 2499 m, and greater than or equal  
96 to 2500 m. [18] The natural region of each district was also described according to Javier Pulgar  
97 Vidal's classification as follows: Lima and Callao, rest of the coast, Sierra and Selva [19]. We  
98 described the Peruvian monetary poverty of 2018 in quintiles according to the National Institute  
99 of Statistics and Informatics (INEI in Spanish). The original report presented the poverty  
100 percentage of the 1874 districts of Peru in descending order. We reclassified by quintiles from 1  
101 to 5. Quintile 1 was the one with the highest percentage of poverty. INEI defines the monetary  
102 poverty as those whose per capita spending is below the value of a basket of products (food and  
103 non-food such as housing, clothing, education, health, transportation, etc.). that allows the  
104 minimum needs to be satisfied. It includes monetary and non-monetary expenses such as self-  
105 consumption, self-supply, payments in kind, transfers from other households and public  
106 donations. This data was prepared using the theorem of Elbers et al and was calculated by  
107 combining the results of a household survey with representative regions and census information.  
108 [20]. A summarized version of the poverty values for each quintile can be seen in the  
109 supplementary table 3.

110 From data of the death certificates, we described sex (female, male), age group (0 to 11.9; 12 to  
111 18; 18 to 29.9; 30 to 59.9 and  $\geq 60$  years old), education level (illiterate, primary, secondary,  
112 higher, not registered), health services insurance (General Population, Employee, Armed or  
113 Police Forces, Private and uninsured) and place of death (health center, home, public road / in  
114 transit / workplace, unknown). Finally, we describe the presence of arterial hypertension (yes/no),  
115 obesity (yes/no), cancer (yes/no), coronary heart disease (yes/no), and cerebral stroke (yes/no).  
116 The definitions used were based on ICD-10 coding or written diagnoses.

## 117 **Procedures**

118 The database was downloaded on January 12, 2021 from the National Data Open Platform of the  
119 Government of Peru [21].

120 The diagnosis of COVID-19 or comorbidities was based on the finding of the respective ICD-10  
121 codes. For those who did not have ICD-10 coding, manual searches for words or groups of letters  
122 that approximated the diagnosis were carried out using the filters of the Microsoft Excel  
123 spreadsheet. The ICD-10 codes and texts used are detailed in the **Supplementary Table 1**.

124 The diagnosis of the underlying cause of death was made by a physician with experience in  
125 clinical epidemiology and management of the death database. Taking as priority the diagnosis of  
126 last place according to the PAHO provision for the completion of death certificates and the  
127 evaluator's criteria.

128 The SINADEF database does not contain data on altitude, monetary poverty, or natural region.  
129 This data was added to each deceased according to their district of origin. We perform a list of  
130 1854 districts of our country of these three variables. The data was obtained from the National  
131 Institute of Statistics and Informatics of Peru (INEI in Spanish). Using a search and assignment  
132 formula in Microsoft Excel spreadsheet; data was transferred to each subject.

## 133 **Analysis plan and sample size power**

134 First of all, we evaluated the presence of extreme values; recoded texts to prespecified codes and  
135 generated new variables as described above [22].

136 We calculated the proportion of deaths from COVID-19 according to the altitude of area of origin.  
137 Both variables were described according to sociodemographic characteristics and underlying  
138 cause of death. We evaluated the difference between proportions according to Pearson's Chi-  
139 square test, considering a significance level of 0.05.

140 Considering that the data presents a geographical hierarchical pattern and people shared common  
141 characteristics according to geography. And it is a potential limitation for the assumption of

142 independence of observations. We carried out a multilevel model considering the territorial level  
143 of province and natural region. Likewise, it was verified whether the multilevel model would  
144 contribute more than the single level model by verifying whether the random disturbance around  
145 the constant is zero. [23] Then, we carried out a Poisson regression analysis with robust variance  
146 to estimate the risk ratio of death and its relationship with the altitude of residence. We verify the  
147 absence of overdispersion using deviance and degrees of freedom. We built a first model adjusted  
148 for age and sex. Then a second model, in which we add comorbidities. And a third model, in  
149 which we add the contextual variable monetary poverty to the previous model. Finally, we did a  
150 sensitivity analysis to evaluate the change in the proportion of deaths every 100, 250, 500 and  
151 1000 m. We presented all RRs with 95% confidence interval.[24] For data analysis, we used Stata  
152 v18 (StataCorp, College Station, Texas, USA).

153

154 We performed power evaluation to evaluate differences between the proportion of three  
155 independent groups. For this we use the artbin formula of Stata 18 program. For the calculation  
156 we consider the proportion of death due to COVID of each altitude category, the sampling ratio  
157 of each group considering the first group as 1 and the other two groups based on this. a two-tailed  
158 5% level of significance. Obtaining a power of 97.5%.[25] Formula details can be seen in  
159 Supplementary Table 4.

## 160 **Ethics**

161 We use publicly accessible data from the website of the Ministry of Health of Peru. No records  
162 contained individually identifying data. The research protocol was reviewed and approved by the  
163 Institutional ethics and Research Committee of the Universidad Científica del Sur under code  
164 CONSTANCIA N°49-CIEI-CIENTIFICA-2021.

## 165 Results

166 We selected deaths that occurred between March and December 2020 that comprised 188 478  
167 subjects. After excluding subjects without DM, deaths abroad, incomplete data, or unknown cause  
168 of death; we finally included 16 406 deaths. Of which 5623 died from COVID-19 (**Fig 1**).

### 169 Fig 1. Selection Flow Chart

170

### 171 Characteristics of deaths with DM

172 Of the 16406 deaths with DM, 56% were men and 75% were older than 60 years. Only 6.9%  
173 didn't have insurance, 40% died at home and the region with the highest mortality was Lima  
174 (42%). In addition, 75% of deaths come from areas of the quintile with the lowest national  
175 percentage of monetary poverty. Likewise, 9.7% came from areas with an altitude above 2 500 m  
176 Approximately, 52.3% presented an infectious disease as the basic cause of death and 43.1% a  
177 non-communicable cause. In relation to comorbidities, 29.6% reported high blood pressure, 3%  
178 obesity and 3.8% cancer of any kind. 40.4% subjects were positive for SARS CoV-2, which  
179 included 25.3% as confirmed diagnosis and 9.4% as probable diagnosis. (Table 1)

180 **Table 1. Demographic characteristics of deceased with diabetes mellitus according to**  
181 **altitude of origin in Peruvians March - December 2020**

|                  | Total       | (%)    | <1500 m     | (%)    | 1500 - 2499 m | (%)    | ≥ 2500 m    | (%)    | Valor p |
|------------------|-------------|--------|-------------|--------|---------------|--------|-------------|--------|---------|
| <b>General</b>   | 16406       |        | 13649       |        | 1159          |        | 1598        |        |         |
| <b>Sex</b>       |             |        |             |        |               |        |             |        | <0.001  |
| Female           | 7225        | (44.0) | 5917        | (43.3) | 524           | (45.2) | 784         | (49.1) |         |
| Male             | 9181        | (55.9) | 7732        | (56.6) | 635           | (54.8) | 814         | (50.9) |         |
| <b>Age group</b> |             |        |             |        |               |        |             |        |         |
| Media ± SD       | 68.2 ± 14.1 |        | 68.3 ± 14.1 |        | 69.4 ± 14.0   |        | 64.6 ± 12.6 |        |         |
| 0 – 11.9         | 18          | (0.1)  | 17          | (0.1)  | 0             | (0)    | 1           | (0.1)  |         |
| 12 – 17.9        | 13          | (0.1)  | 12          | (0.1)  | 1             | (0.1)  | 0           | (0)    |         |
| 18 – 29.9        | 133         | (0.8)  | 104         | (0.7)  | 11            | (0.9)  | 18          | (1.1)  |         |



|                                      |              |              |             |              |        |
|--------------------------------------|--------------|--------------|-------------|--------------|--------|
| 30 – 59.9                            | 3924 (23.9)  | 3216 (23.6)  | 259 (22.4)  | 449 (28.1)   |        |
| ≥ 60 years                           | 12317 (75.1) | 10299 (75.5) | 888 (76.6)  | 1130 (70.7)  |        |
| <b>Education level</b>               |              |              |             |              |        |
| Illiterate                           | 1424 (8.7)   | 1049 (7.7)   | 109 (9.4)   | 266 (16.7)   | <0.001 |
| Primary                              | 4141 (25.2)  | 3366 (24.7)  | 310 (26.7)  | 465 (29.1)   |        |
| Secondary                            | 4280 (26.1)  | 3612 (26.5)  | 293 (25.3)  | 375 (23.5)   |        |
| Higher                               | 2025 (12.3)  | 1601 (11.7)  | 182 (15.7)  | 242 (15.1)   |        |
| No registration                      | 4536 (27.7)  | 4021 (29.4)  | 265 (22.9)  | 250 (15.6)   |        |
| <b>Health insurance</b>              |              |              |             |              |        |
| General population                   | 7543 (46.0)  | 6109 (44.8)  | 451 (38.9)  | 983 (61.5)   | <0.001 |
| Employer                             | 6542 (39.9)  | 5577 (40.9)  | 525 (45.3)  | 440 (27.5)   |        |
| Armed Forces and Police              | 491 (3.00)   | 428 (3.1)    | 27 (2.3)    | 36 (2.3)     |        |
| Private / others                     | 690 (4.2)    | 595 (4.4)    | 35 (3.0)    | 60 (3.7)     |        |
| Uninsured                            | 1140 (6.9)   | 940 (6.9)    | 121 (10.4)  | 79 (4.9)     |        |
| <b>Place of death</b>                |              |              |             |              |        |
| Healthcare center                    | 9861 (60.1)  | 8213 (60.2)  | 705 (60.8)  | 943 (59.0)   | <0.001 |
| Home                                 | 6233 (38.0)  | 5223 (38.3)  | 397 (34.3)  | 613 (38.3)   |        |
| Public road/in transit               | 300 (1.8)    | 201 (1.5)    | 57 (4.9)    | 42 (2.6)     |        |
| Unknown                              | 12 (0.1)     | 12 (0.1)     | 0 (0.0)     | 0 (0.0)      |        |
| <b>Natural region</b>                |              |              |             |              |        |
| Lima-Callao                          | 6872 (41.9)  | 6872 (50.4)  | 0 (0.0)     | 0 (0.0)      | <0.001 |
| Rest of coast                        | 4968 (30.3)  | 4968 (36.4)  | 0 (0.0)     | 0 (0.0)      |        |
| Sierra                               | 3001 (18.3)  | 381 (2.8)    | 1022 (88.2) | 1598 (100.0) |        |
| Jungle                               | 1565 (9.5)   | 1428 (10.4)  | 137 (11.8)  | 0 (0.0)      |        |
| <b>Poverty quintile <sup>a</sup></b> |              |              |             |              |        |
| Quintile 5 (Greater poverty)         | 197 (1.2)    | 45 (0.3)     | 37 (3.2)    | 115 (7.2)    | <0.001 |
| Quintile 4                           | 347 (2.1)    | 102 (0.8)    | 43 (3.7)    | 202 (12.6)   |        |
| Quintile 3                           | 757 (4.6)    | 557 (4.1)    | 12 (1.0)    | 188 (11.7)   |        |
| Quintile 2                           | 2877 (17.5)  | 2332 (17.1)  | 66 (5.7)    | 479 (30.0)   |        |
| Quintile 1 (Less poverty)            | 12228 (74.5) | 10613 (77.8) | 1001 (86.4) | 614 (38.4)   |        |
| <b>Basic cause of death</b>          |              |              |             |              |        |
| Infectious                           | 8573 (52.3)  | 7176 (52.6)  | 613 (52.9)  | 784 (49.1)   | <0.001 |
| Not communicable                     | 7075 (43.1)  | 5851 (42.9)  | 456 (39.3)  | 768 (48.1)   |        |
| External                             | 487 (2.9)    | 392 (2.9)    | 59 (5.1)    | 36 (2.3)     |        |
| Not determined                       | 271 (1.7)    | 230 (1.7)    | 31 (2.7)    | 10 (0.6)     |        |
| <b>SARS-CoV-2</b>                    |              |              |             |              |        |
| Negative                             | 9770 (59.6)  | 8029 (58.8)  | 706 (60.9)  | 1035 (64.8)  | <0.001 |
| Positive <sup>b</sup>                | 6636 (40.4)  | 5620 (41.2)  | 453 (39.1)  | 563 (35.2)   |        |

|                                |       |        |       |        |      |        |      |        |        |
|--------------------------------|-------|--------|-------|--------|------|--------|------|--------|--------|
| Confirmed                      | 4159  | (25.3) | 3455  | (25.3) | 271  | (23.4) | 433  | (27.1) |        |
| Probable                       | 1548  | 9.4    | 1334  | 9.8    | 139  | 12.0   | 75   | 4.7    |        |
| Other code                     | 929   | 5.7    | 831   | 6.1    | 43   | 3.7    | 45   | 3.4    |        |
| <b>Comorbidity</b>             |       |        |       |        |      |        |      |        |        |
| <b>Hypertension</b>            |       |        |       |        |      |        |      |        |        |
| Yes                            | 4849  | (29.6) | 4326  | (31.7) | 249  | (21.5) | 274  | (17.2) | <0.001 |
| No                             | 11557 | (70.4) | 9323  | (68.3) | 910  | (78.5) | 1324 | (82.8) |        |
| <b>Obesity</b>                 |       |        |       |        |      |        |      |        |        |
| Yes                            | 490   | (3.0)  | 405   | (3.0)  | 40   | (3.4)  | 45   | (2.8)  | 0.594  |
| No                             | 15916 | (97.0) | 13244 | (97.0) | 1119 | (96.6) | 1553 | (97.2) |        |
| <b>Cancer</b>                  |       |        |       |        |      |        |      |        |        |
| Yes                            | 627   | (3.8)  | 534   | (3.9)  | 42   | (3.6)  | 51   | (3.2)  | 0.340  |
| No                             | 15779 | (96.2) | 13115 | (96.1) | 1117 | (96.4) | 1547 | (96.8) |        |
| <b>Coronary Hearth Disease</b> |       |        |       |        |      |        |      |        |        |
| Yes                            | 2735  | (16.7) | 2448  | (17.9) | 182  | (15.7) | 105  | (6.6)  | <0.001 |
| No                             | 13671 | (83.3) | 11201 | (82.1) | 977  | (84.3) | 1493 | (93.4) |        |
| <b>Stroke</b>                  |       |        |       |        |      |        |      |        |        |
| Yes                            | 799   | (4.9)  | 688   | (5.0)  | 48   | (4.1)  | 63   | (3.9)  | 0.076  |
| No                             | 15607 | (95.1) | 12961 | (95.0) | 1111 | (95.9) | 1535 | (96.1) |        |

182 Source: National System of Deaths from March to December 2019 and 2020.

183 <sup>a</sup> People residing in households whose per capita spending is insufficient to acquire a basic basket of food  
184 and non-food (INEI)

185 <sup>b</sup> COVID positive: ICD10 (U07.1, U07.2, B34.X or J97.X) or by written diagnosis (“COVID”,  
186 “Coronavirus”, “SARS CoV-2”). COVID Negative: Absence of any of the words in the previous definition.

187

## 188 **Characteristics of deaths with DM above 2500 m**

189 In subjects living above 2 500 m a similar proportion of men and women was observed, unlike  
190 low-lying areas, in which men predominated ( $p < 0.001$ ). A slightly higher proportion of middle-  
191 aged subjects and lower proportion of older adults was observed ( $p < 0.001$ ). These patients had a  
192 higher proportion of illiterates and came from areas with the highest monetary poverty quintile.  
193 Non-communicable causes of death predominated more frequently. Regarding comorbidities,  
194 lower arterial hypertension and lower coronary disease were observed, but obesity and cancer of

195 any type were similar. The place of death at home or in a health center was like that in areas of  
196 lower altitude (Table 1).

## 197 **Proportion of death from COVID-19**

198 The proportion of deaths from COVID-19 was 34.3% (95% CI 33.6–35.1). According to altitude,  
199 it was 34.8% (95% CI; 34.0 – 35.6) below 1 500 m. 34.6% (95% CI; 31.8 – 37.4) between 1 500-2  
200 499 m and 29.6% (95% CI; 27.4 – 31.9) above 2 500 m.

201 The proportion of deaths from COVID-19 was higher in males than in females (37.7%; vs 29.9%;  
202  $p<0.001$ ). The highest proportion occurred in the middle age compared to other age groups (40.5%  
203 between 30 to 59 years old, versus 32.4% in those older than 60 years;  $p<0.001$ ). A higher  
204 proportion was also observed with a higher level of instruction (15.2% in illiterate or 16.9% in  
205 primary school vs. 28.2% in secondary school and 27.2% in higher education;  $p<0.001$ ).

206 Regarding health insurance, 48.1% with military or police insurance died from COVID-19, 35.7%  
207 with General Population Health Insurance and 33.9% with Employee Health insurance ( $p<0.001$ ).  
208 Regarding the place of death, 53.2% who died in health centers was due to COVID-19 and 5.1%  
209 at home ( $p<0.001$ ).

210 The coastal area had the highest percentage of deaths from COVID 19, much more so in the area  
211 outside of Lima/Callao. 37.1 vs 33.8. In descending order, there were the mountains and the  
212 jungle. ( $p<0.001$ ).

213 The frequency of death by poverty quintile was U-shaped. In quintile 1 (less poverty), 35.7% died  
214 from COVID-19, falling to 31.5% in quintile 2 and then rising progressively in quintile 5 with  
215 36.6%. (Table 2)

216 **Table 2. Proportion of death from COVID-19 as the underlying cause according to**  
217 **demographic characteristics in deceased with diabetes mellitus.**

|                                    | Death from<br>COVID-19 | (%)    | Death from<br>another<br>cause | (%)    | P value |
|------------------------------------|------------------------|--------|--------------------------------|--------|---------|
| <b>General</b>                     | 5623                   | (34.3) | 10783                          | (65.7) |         |
| <b>Sex</b>                         |                        |        |                                |        |         |
| Female                             | 2163                   | (29.9) | 5062                           | (70.1) | <0.001  |
| Male                               | 3460                   | (37.7) | 5721                           | (62.3) |         |
| <b>Age group</b>                   |                        |        |                                |        |         |
| 0 – 11.9 years old                 | 1                      | (5.6)  | 17                             | (94.4) | <0.001  |
| 12 – 17.9 years old                | 2                      | (15.4) | 11                             | (84.6) |         |
| 18 – 29.9 years old                | 37                     | (27.8) | 96                             | (72.2) |         |
| 30 – 59.9 years old                | 1588                   | (40.5) | 2336                           | (59.5) |         |
| > 60 years old                     | 3994                   | (32.4) | 8323                           | (67.6) |         |
| <b>Instruction</b>                 |                        |        |                                |        |         |
| Illiterate                         | 217                    | (15.2) | 1207                           | (84.8) | <0.001  |
| Initial/primary                    | 699                    | (16.9) | 3442                           | (83.1) |         |
| Secondary                          | 1206                   | (28.2) | 3074                           | (71.8) |         |
| Higher                             | 550                    | (27.2) | 1475                           | (72.8) |         |
| No registration                    | 2951                   | (65.1) | 1585                           | (34.9) |         |
| <b>Health insurance</b>            |                        |        |                                |        |         |
| General population                 | 2695                   | (35.7) | 4848                           | (64.3) | <0.001  |
| Employee                           | 2217                   | (33.9) | 4325                           | (66.1) |         |
| Armed Forces and Police            | 236                    | (48.1) | 255                            | (51.9) |         |
| Private / others                   | 197                    | (28.6) | 493                            | (71.4) |         |
| Uninsured                          | 278                    | (24.4) | 862                            | (75.6) |         |
| <b>Place of death</b>              |                        |        |                                |        |         |
| Health establishment               | 5242                   | (53.2) | 4619                           | (46.8) | <0.001  |
| Home                               | 320                    | (5.1)  | 5913                           | (94.9) |         |
| Public road/in transit             | 56                     | (18.7) | 244                            | (81.3) |         |
| Unknown                            | 5                      | (41.7) | 7                              | (58.3) |         |
| <b>Natural región <sup>a</sup></b> |                        |        |                                |        |         |
| Lima-Callao                        | 2324                   | (33.8) | 4548                           | (66.2) | <0.001  |
| Rest of coast                      | 1841                   | (37.1) | 3127                           | (62.9) |         |

|                                     |      |        |       |         |        |
|-------------------------------------|------|--------|-------|---------|--------|
| HIGHLANDS                           | 980  | (32.7) | 2021  | (67.3)  |        |
| Jungle                              | 478  | (30.5) | 1087  | (69.5)  |        |
| <b>Monetary poverty<sup>b</sup></b> |      |        |       |         |        |
| Quintile 5 ( Greater poverty        | 72   | (36.6) | 125   | (63.5)  | <0.001 |
| Quintile 4                          | 79   | (22.8) | 268   | (77.2)  |        |
| Quintile 3                          | 200  | (26.4) | 557   | (73.6)  |        |
| Quintile 2                          | 905  | (31.5) | 1972  | (68.5)  |        |
| Quintile 1 Less poverty             | 4367 | (35.7) | 7861  | (64.3)  |        |
| <b>Infectious cause of death</b>    |      |        |       |         |        |
| Yes                                 | 5623 | (65.6) | 2950  | (34.4)  | <0.001 |
| No                                  | 0    | (0.0)  | 7833  | (100.0) |        |
| <b>SARS-CoV-2</b>                   |      |        |       |         |        |
| Negative                            | 0    | (0.0)  | 9770  | (100.0) | <0.001 |
| Positive <sup>c</sup>               | 5623 | (84.7) | 1013  | (15.3)  |        |
| Confirmed                           | 3658 | (88.0) | 501   | (12.0)  |        |
| Probable                            | 1598 | (88.6) | 206   | (11.4)  |        |
| Other codes                         | 367  | (54.5) | 306   | (45.4)  |        |
| <b>Comorbidity</b>                  |      |        |       |         |        |
| <b>Hypertension</b>                 |      |        |       |         |        |
| Yes                                 | 1611 | (33.2) | 3238  | (66.8)  | <0.001 |
| No                                  | 4012 | (34.7) | 7545  | (65.3)  |        |
| <b>Obesity</b>                      |      |        |       |         |        |
| Yes                                 | 325  | (66.3) | 165   | (33.7)  | <0.001 |
| No                                  | 5298 | (33.3) | 10618 | (66.7)  |        |
| <b>Cancer</b>                       |      |        |       |         |        |
| Yes                                 | 50   | (8.0)  | 577   | (92.0)  | <0.001 |
| No                                  | 5573 | (35.3) | 10206 | (64.7)  |        |
| <b>Coronary heart disease</b>       |      |        |       |         |        |
| Yes                                 | 22   | (0.8)  | 2713  | (99.2)  | <0.001 |
| No                                  | 5601 | (41.0) | 8070  | (59.0)  |        |
| <b>Stroke</b>                       |      |        |       |         |        |
| Yes                                 | 60   | (7.5)  | 739   | (92.5)  | <0.001 |
| No                                  | 5563 | (35.6) | 10044 | (64.4)  |        |

**Altitude (m a.s.l.)**

|           |             |             |        |
|-----------|-------------|-------------|--------|
| <1500     | 4749 (34.8) | 8900 (65.2) | <0.001 |
| 1500-2499 | 401 (34.6)  | 758 (65.4)  |        |
| ≥ 2500    | 473 (29.6)  | 1125 (70.4) |        |

218

219 Source: National System of Deaths from March to December 2020. Armed Forces and PP: Armed Forces  
220 and Police. m a.s.l.: meters above sea level. SIS: Seguro Integral de Salud.

221 a: Coast the flat and undulating lands, bordering the Pacific Ocean. Highlands to all the mountainous  
222 territory, broken and high plateau that rises to the snowy peaks. Jungel to wooded region, criss-crossed by  
223 mighty rivers.

224 b: People residing in households whose per capita spending is insufficient to acquire a basic basket of food  
225 and non-food (INEI)

226 c: COVID: COVID positive: ICD10 (U07.1, U07.2, B34.X or J97.X) or by written diagnosis (“COVID”,  
227 “Coronavirus”, “SARS CoV-2”). COVID Negative: Absence of any of the words in the previous definition.

228

229 **Risk ratios of death from COVID-19 according to altitude**

230 There were 20% fewer deaths of those from an area above 2 500 m compared to lower altitude  
231 areas adjusted for age, sex, high blood pressure, obesity, cancer, coronary heart disease, stroke  
232 and monetary poverty (RR 0.80; 95% CI 0.75-0.88; p <0.001). (Table 3 and Supplementary table  
233 5)

**Table 3. Crude and adjusted risk ratio of death from COVID-19 as the underlying cause according to altitude in deceased Peruvians with diabetes mellitus.**

|                            | Crude analysis     |         | Ajusted model A    |         | Ajusted model B    |         | Ajusted model C    |         |
|----------------------------|--------------------|---------|--------------------|---------|--------------------|---------|--------------------|---------|
|                            | RR (95% CI)        | p-value | RR (95% CI)        | p-value | RR (95% CI)        | p-value | RR (95% CI)        | p-value |
| <b>Altitude (m a.s.l.)</b> |                    |         |                    |         |                    |         |                    |         |
| <1500                      | 1.00               |         | 1.00               |         | 1.00               |         | 1.00               |         |
| 1500- 2499                 | 0.87 (0.71 – 1.09) | 0.242   | 0.90 (0.73 – 1.11) | 0.341   | 0.90 (0.74 . 1.11) | 0.351   | 0.90 (0.75 – 1.09) | 0.290   |
| ≥ 2500                     | 0.79 (0.69 – 0.91) | <0.001  | 0.79 (0.69 – 0.91) | <0.001  | 0.76 (0.67 – 0.86) | <0.001  | 0.80 (0.70 – 0.91) | <0.001  |

RR: Risk Ratio

Model A: Adjusted for age and sex. Model B: Adjusted for age, sex, high blood pressure, obesity, cancer, coronary heart disease, stroke. Model C: Adjusted for age, sex, high blood pressure, obesity, cancer, coronary heart disease, stroke and monetary poberty

## Sensitivity analysis

We performed a sensitivity analysis every 100, 250, 500 and 1 000 m and observed a constant decrease as altitude increases. The proportion of deaths from COVID-19 decreased by 0.8% every 100 m a.s.l. (RR 0.992; 95% CI 0.988-0.996,  $p < 0.001$ ); 1.8% every 250 m a.s.l. (RR 0.982; 95% CI 0.972-0.992;  $p < 0.001$ ); 4.0% every 500 m a.s.l (RR 0.960; 95% CI 0.940-0.981;  $p < 0.001$ ) or 7.1% every 1000 m a.s.l. (RR 0.929; 95% CI 0.893-0.967;  $p < 0.001$ ). All RR also were adjusted for age, sex, high blood pressure, obesity, cancer, coronary heart disease, stroke and monetary poverty (**Table 4** and Supplementary tables 6,7,8 and 9).



**Table 4. Sensitivity analysis of altitude in deceased Peruvians with diabetes mellitus.**

|                    | Crude analysis         |         | Adjusted model A      |         | Adjusted model B      |         | Adjusted model C       |         |
|--------------------|------------------------|---------|-----------------------|---------|-----------------------|---------|------------------------|---------|
|                    | RR (95% CI)            | p-value | RR (95% CI)           | p-value | RR (95% CI)           | p-value | RR (95% CI)            | p-value |
| <b>Altitude (m</b> |                        |         |                       |         |                       |         |                        |         |
| <b>a.s.l)</b>      |                        |         |                       |         |                       |         |                        |         |
| Δ 100 m            | 0.992 (0.988 – 0.997)  | 0.002   | 0.993 (0.988 – 0.997) | 0.002   | 0.991 (0.987 – 0.995) | <0.001  | 0.992 (0.988 -. 0.996) | <0.001  |
| Δ 250 m            | 0.982 (0.971 – 0.993)  | 0.002   | 0.983 (0.972 – 0.994) | 0.002   | 0.978 (0.968 – 0.988) | <0.001  | 0.982 (0.972 -. 0.992) | <0.001  |
| Δ 500 m            | 0.960 (0.939 – 0.982)  | <0.001  | 0.962 (0.940 – 0.983) | 0.002   | 0.953 (0.933 – 0.973) | <0.001  | 0.960 (0.940 - 0.981)  | <0.001  |
| Δ 1000 m           | 0.9310 (0.890 – 0.973) | 0.002   | 0.933 (0.892 – 0.975) | 0.002   | 0.916 (0.880 – 0.954) | <0.001  | 0.929 (0.893 - 0.967)  | <0.001  |

Model A: Adjusted for age and sex. Model B: Adjusted for age, sex, high blood pressure, obesity, cancer, coronary heart disease, stroke. Model C: Adjusted for age, sex, high blood pressure, obesity, cancer, coronary heart disease, stroke and monetary poberty.

## Discussion

Altitude modifies glucose metabolic in patients with DM improving insulin sensitivity and potentially protecting against complications. Our study found that in those deceased with DM, one out of three died due to COVID-19 and one out of 10 deaths occurred above 2 500 m. Likewise, the proportion of deaths from COVID-19 above 2500 m was 20% lower compared to lower altitudes.

Many of the countries in the world were affected at the first level of care by COVID-19 during the first wave. Facility closures, staff shortages or supply problems affected one out of four emergency services in up to 25% of countries [26]. Emergency care, preventive-promotional care, and outpatient consultations were limited leading to the strengthening of telehealth and telemedicine. [27]

In Peru, a quarter of the Peruvian population lives above 2 500 m [28] and there is a greater population located in the capital cities where overcrowding and number of vehicles and greater pollution that facilitated SARS-CoV-2 expansion [29] The return of the immobilized population in the big cities to their places of origin raised the rates of the virus in the high Andean areas. However, this lower trend in rates was maintained when adjusted for population. Similar to our study, a report in Mexico compared deceased with diabetes according altitude of residence. Those who lived above 1 500 presented fewer cases of COVID pneumonia and a lower proportion of deaths. However, they were at higher risk than the population without diabetes.[30]. Other clinical series based on general population maintain this trend of lower proportion of death at higher altitudes, adjusting for population density and poverty level. [31]

It is postulated that under conditions of hypoxia, the production of hypoxia-inducible transcription factor 1 (HIF1) is increased, so that ACE increases and stimulates the expression of angiotensin II (ACE2), which regulates AT1 receptors, generating a lower expression of ACE2. Fewer ACE2 receptors would mean a lower viral load and decrease of SARS-CoV-2 infection.[32] Likewise,

the increase expression of erythropoietin presents a cytoprotective action, reducing inflammation and improving the microvascular injury of cytotoxins in the blood [33]

On another hand, some reports have demonstrated the absence of this clinical impact. [34]. However, in patients with diabetes mellitus, this is not clear. Chronic exposure to high altitude results in low glucose levels mediated by improved insulin sensitivity and increased peripheral glucose uptake. The reasons for these adaptations are still unknown. Likewise, an inverse relationship between altitude with diabetes and obesity is well documented. Being the result of genetic and physiological adaptations, due to hypoxia in the glucose metabolism. important factors are also diet and lifestyle patterns.[12]

Analyzing this relationship by subgroups. In men, an increased risk of death from COVID-19 could be due to a greater number of ACE receptors, however lower rate was observed at higher altitudes. In women, immunosuppressive effect of estrogens also led to lower mortality [35]. According to age, case fatality rate have higher numbers in older age groups. However, the percentage of deaths from COVID-19 in each age group was higher in the middle age group because this age group presented an exposure without having adequate security measures to carry the daily monetary income due to prolonged closure . [36]

## **Importance in public health**

Peru is one of the first countries with the highest mortality from SARS-CoV-2 in Latin America and the world. Non-communicable diseases were the most prevalent in deceased diabetics. It is important to recognize the limitations that arose during the first wave and its impact.

Diabetes control was affected by the closure of primary care centers [37]. One study reported that glycemic control and high fasting blood sugar worsened during the SARS-CoV-2 outbreak at the big cities which caused a higher incidence of complications and poor control of the disease [38] . Likewise, this study contribute to expanding knowledge of the effects of altitude with respect to mortality in people with diabetes mellitus in a context of a highly contagious and virulent infectious disease.

Also, we recommended a permanent awareness and training campaign is suggested for all medical personnel to correctly fill out the death certificate, due to the deficiencies found now and in previous studies that limit their correct interpretation [39].

## **Limitations and strengths**

One of our limitations was the poor registration of the death certificates of the basic cause of death and the use of the ICD-10. Due to serological tests, there was a high proportion of false negatives and were the main diagnostic method during the first wave in Peru. The diabetes mellitus assignment may have been underrepresented, because there are only six fields for that. The first four for the causes and two for the comorbidities. The altitude was obtained according to the district of origin of the death based on the official government records however may not be precise in those who migrated or have a stable residence at another altitude. The design does not allow a causal relationship to be established with high certainty between the variables, but it does allow the influence of the basic sociodemographic variables to be analyzed. Another limitation was not being able to include clinical or therapeutic variables that potentially influence the association. As well as being able to differentiate those cases of hyperglycemia due to stress caused by SARS-CoV-2 infection, which may overestimate some results.

On the other hand, one of our strengths is that the SINADEF has registered all the deceased at the national level, obtaining a better analysis of region, province and district level. We perform a multilevel analysis based in province and natural region. As well as a sensitivity analysis using different altitude increments.

## **Conclusion**

During the first wave, the proportion of deaths from COVID-19 of people residing above 2 500 m was 20% lower than in areas of lower altitude, adjusted for individual and socioeconomic factors. Its influence is also shown as the altitude changes every 100, 250, 500 and 1000 m a.s.l., through multilevel analysis. In high Andean areas, there is greater insulin sensitivity which may

be a protective factor against complications. The study contribute to expanding knowledge of the effects of altitude with respect to mortality in people with diabetes mellitus in a context of a highly contagious and virulent infectious disease.

## References

1. Mortality Analyses - Johns Hopkins Coronavirus Resource Center. [cited 8 Jan 2024]. Available: <https://coronavirus.jhu.edu/data/mortality>
2. Coronavirus tracker: the latest figures as countries fight the Covid-19 resurgence | Free to read. [cited 8 Jan 2024]. Available: <https://www.ft.com/content/a2901ce8-5eb7-4633-b89c-cbdf5b386938>
3. Chirinos-Cáceres JL. La salud pública en el Perú y el COVID--19. *Acta Herediana*. 2020;63: 105–108. doi:10.20453/AH.V63I2.3831
4. Pinedo-Torres I, Flores-Fernández M, Yovera-Aldana M, Gutierrez-Ortiz C, Zegarra-Lizana P, Intimayta-Escalante C, et al. Prevalence of Diabetes Mellitus and Its Associated Unfavorable Outcomes in Patients With Acute Respiratory Syndromes Due to Coronaviruses Infection: A Systematic Review and Meta-Analysis. *Clin Med Insights Endocrinol Diabetes*. 2020;13. doi:10.1177/1179551420962495
5. Huang I, Lim MA, Pranata R. Diabetes mellitus is associated with increased mortality and severity of disease in COVID-19 pneumonia – A systematic review, meta-analysis, and meta-regression. *Diabetes & Metabolic Syndrome: Clinical Research & Reviews*. 2020;14: 395–403. doi:10.1016/J.DSX.2020.04.018
6. Ni W, Yang X, Yang D, Bao J, Li R, Xiao Y, et al. Role of angiotensin-converting enzyme 2 (ACE2) in COVID-19. *Crit Care*. 2020;24: 1–10. doi:10.1186/S13054-020-03120-0/FIGURES/3

7. Quevedo-Ramirez A, Al-Kassab-Córdova A, Mendez-Guerra C, Cornejo-Venegas G A-CKP. Altitude and excess mortality during COVID-19 pandemic in Peru. *Respir Physiol Neurobiol.* 2020;281: 103512. doi:10.1016/j.resp.2020.103512
8. Campos A, Scheveck B, Parikh J, Hernandez-Bojorge S, Terán E, Izurieta R. Effect of altitude on COVID-19 mortality in Ecuador: an ecological study. *BMC Public Health.* 2021;21: 1–9. doi:10.1186/S12889-021-12162-0/TABLES/3
9. Duijf PHG. Low Baseline Pulmonary Levels of Cytotoxic Lymphocytes as a Predisposing Risk Factor for Severe COVID-19. *mSystems.* 2020;5: 1–13. doi:10.1128/msystems.00741-20
10. Nicolaou L, Steinberg A, Carrillo-Larco RM, Hartinger S, Lescano AG, Checkley W. Living at High Altitude and COVID-19 Mortality in Peru. *High Alt Med Biol.* 2022;23: 146–158. doi:10.1089/HAM.2021.0149/SUPPL\_FILE/SUPPL\_TABLES1.DOCX
11. Segovia-Juarez J, Castagnetto JM, Gonzales GF, Sci D. High altitude reduces infection rate of COVID-19 but not case-fatality rate. 2020 [cited 8 Jan 2024]. doi:10.1016/j.resp.2020.103494
12. Koufakis T, Karras SN, Mustafa OG, Zebekakis P, Kotsa K. The Effects of High Altitude on Glucose Homeostasis, Metabolic Control, and Other Diabetes-Related Parameters: From Animal Studies to Real Life. *High Alt Med Biol.* 2019;20: 1–11. doi:10.1089/HAM.2018.0076/ASSET/IMAGES/LARGE/FIGURE1.JPEG
13. Seclen SN, Rosas ME, Arias AJ, Medina CA. Elevated incidence rates of diabetes in Peru: report from PERUDIAB, a national urban population-based longitudinal study. *BMJ Open Diabetes Res Care.* 2017;5: e000401. doi:10.1136/BMJDR-2017-000401
14. Ministerio de Salud. Prevención, diagnóstico y tratamiento de personas afectadas por COVID-19 en el Perú. Apr 2020 [cited 8 Jan 2024]. Available: [https://cdn.www.gob.pe/uploads/document/file/582567/Prevencio%CC%81n\\_\\_Diagno%](https://cdn.www.gob.pe/uploads/document/file/582567/Prevencio%CC%81n__Diagno%)

CC%81stico\_y\_Tratamiento\_de\_personas\_afectadas\_por\_COVID-19\_en\_el\_Peru%CC%81\_.PDF?v=1588182165

15. Ministerio de Salud. Criterios técnicos para actualizar la cifra de fallecidos por COVID-19 en el Perú. May 2021 [cited 8 Jan 2024]. Available: <https://cdn.www.gob.pe/uploads/document/file/1920747/Criterios%20t%C3%A9cnicos.pdf>
16. Ministerio de Salud. Guía técnica para el correcto llenado del Certificado de Defunción. 2018 [cited 4 Jun 2021] p. 69. Available: <http://bvs.minsa.gob.pe/local/MINSA/4459.pdf>
17. World Health Organization. Public health surveillance for COVID-19: interim guidance. 2022 [cited 30 Oct 2022]. Available: <https://www.who.int/publications/i/item/who-2019-nCoV-surveillanceguidance-2020.8>
18. Burtscher M. Effects of Living at Higher Altitudes on Mortality: A Narrative Review. *Aging Dis.* 2014;5: 274–280. doi:10.14336/AD.2014.0500274
19. Beraún Chaca JJ, Villanueva Fernández HS. Clasificación de las Regiones Naturales del Perú. Colegio de Geógrafos del Perú, editor. Lima; 2021. Available: <https://cgp.org.pe/publicaciones/boletin3/B3-09.pdf>
20. Mapa de pobreza monetaria provincial y distrital 2018. 2020 [cited 2 Dec 2020] pp. 1–303. Available: [https://www.inei.gob.pe/media/MenuRecursivo/publicaciones\\_digitales/Est/Lib1718/Libro.pdf](https://www.inei.gob.pe/media/MenuRecursivo/publicaciones_digitales/Est/Lib1718/Libro.pdf)
21. Plataforma Nacional de Datos Abiertos. 2022 [cited 5 May 2022]. Available: <https://www.datosabiertos.gob.pe/search/type/dataset>
22. Información de Fallecidos del Sistema Informático Nacional de Defunciones - SINADEF - [Ministerio de Salud]. 2022 [cited 4 Jun 2021]. Available:

- <https://www.datosabiertos.gob.pe/dataset/información-de-fallecidos-del-sistema-informático-nacional-de-defunciones-sinadef-ministerio>
23. Zhang Z, Zyphur MJ, Preacher KJ. Testing Multilevel Mediation Using Hierarchical Linear Models. <https://doi.org/10.1177/1094428108327450>. 2008;12: 695–719. doi:10.1177/1094428108327450
  24. Zou G. A Modified Poisson Regression Approach to Prospective Studies with Binary Data. *Am J Epidemiol*. 2004;159: 702–706. doi:10.1093/AJE/KWH090
  25. Marley-Zagar E, White IR, Royston P, Barthel FMS, Parmar MKB, Babiker AG. artbin: Extended sample size for randomized trials with binary outcomes. *Stata Journal*. 2023;23: 24–52. doi:10.1177/1536867X231161971/SUPPL\_FILE/SJ-ZIP-1-STJ-10.1177\_1536867X231161971.ZIP
  26. Pulse survey on continuity of essential health services during the COVID-19 pandemic: interim report. 2020 [cited 28 Apr 2022]. Available: [https://www.who.int/publications/i/item/WHO-2019-nCoV-EHS\\_continuity-survey-2020.1](https://www.who.int/publications/i/item/WHO-2019-nCoV-EHS_continuity-survey-2020.1)
  27. Villanueva-Carrasco R, Domínguez Samamés R, Salazar De La Cruz M, Cuba-Fuentes MS, Villanueva-Carrasco R, Domínguez Samamés R, et al. Respuesta del primer nivel de atención de salud del Perú a la pandemia COVID-19. *Anales de la Facultad de Medicina*. 2020;81: 337–341. doi:10.15381/ANALES.V81I3.18952
  28. Tremblay JC AP. Global and country-level estimates of human population at high altitude. *Proc Natl Acad Sci USA*. 2021;118: e2102463118. doi:10.1073/pnas.2102463118
  29. Vasquez-Apestequi B V, Parras-Garrido E, Tapia V, Paz-Aparicio VM, Rojas JP, Sanchez-Ccoyllo OR, et al. Association between air pollution in Lima and the high incidence of COVID-19: findings from a post hoc analysis. *BMC Public Health*. 2021;21. doi:10.1186/s12889-021-11232-7



30. Leon-Abarca JA, Portmann-Baracco A, Bryce-Alberti M, Ruiz-Sánchez C, Accinelli RA, Soliz J, et al. Diabetes increases the risk of COVID-19 in an altitude dependent manner: An analysis of 1,280,806 Mexican patients. *PLoS One*. 2021;16: e0255144. doi:10.1371/JOURNAL.PONE.0255144
31. Vizcardo DA, R. Aranibar J, Munayco Escate CV. High altitudes, population density, and poverty: Unraveling the complexities of COVID-19 in Peru during the years 2020–2022. *Prev Med Rep*. 2023;36: 102423. doi:10.1016/J.PMEDR.2023.102423
32. Pun M, Turner R, Strapazon G, Brugger H, Swenson ER. Lower Incidence of COVID-19 at High Altitude: Facts and Confounders. *High Alt Med Biol*. 2020;21: 217–222. doi:10.1089/ham.2020.0114
33. Beleslin-Cokic BB, Cokic VP, Yu X, Weksler BB, Schechter AN, Noguchi CT. Erythropoietin and hypoxia stimulate erythropoietin receptor and nitric oxide production by endothelial cells. *Blood*. 2004;104: 2073–2080. doi:10.1182/blood-2004-02-0744
34. Cardenas L, Valverde-Bruffau V, Gonzales GF. Altitude does not protect against SARS-CoV-2 infections and mortality due to COVID-19. *Physiol Rep*. 2021;9: 9–11. doi:10.14814/phy2.14922
35. Gemmati D, Bramanti B, Serino ML, Secchiero P, Zauli G, Tisato V. COVID-19 and individual genetic susceptibility/receptivity: Role of ACE1/ACE2 genes, immunity, inflammation and coagulation. might the double x-chromosome in females be protective against SARS-COV-2 compared to the single x-chromosome in males? *Int J Mol Sci*. 2020;21: 3474. doi:10.3390/ijms21103474
36. Cuba H. La Pandemia en el Perú. Acciones, impacto y consecuencias del covid-19. 1ra Edición. Lima: Fondo Editorial Comunicacional Colegio Médico del Perú; 2021. Available: <https://www.cmp.org.pe/wp-content/uploads/2021/05/La-Pandemia-CUBA-corregida-vale.pdf>

37. Mohseni M, Ahmadi S, Azami-Aghdash S, Mousavi Isfahani H, Moosavi A, Fardid M, Etemadi M GF. Challenges of routine diabetes care during COVID-19 era: A systematic search and narrative review. *Prim Care Diabetes*. 2021;15: 918–922. doi:10.1016/j.pcd.2021.07.017
38. Klonoff DC, Messler JC, Umpierrez GE, Peng L, Booth R, Crowe J, Garrett V, McFarland R PF. Association Between Achieving Inpatient Glycemic Control and Clinical Outcomes in Hospitalized Patients With COVID-19: A Multicenter, Retrospective Hospital-Based Analysis. *Diabetes Care*. 2021;44: 578–585. doi:10.2337/dc20-1857
39. Zeta-Ruiz N, Soncco C. Calidad del registro del certificado de defunción en un hospital pediátrico de Lima, Perú. *Anales de la Facultad de Medicina*. 2018;78: 405. doi:10.15381/anales.v78i4.14261

## Supporting information

**S1 table. Codes and words used to search for the diagnosis in the database.**

**S2 table. Codes or texts used within the four groups**

**S3 table. Lower and upper limit of the monetary poverty index of each quintile of the sample.**

**S4 table. Calculation of sample power**

**S5 table. Full regression analysis of death from COVID-19 as the underlying cause according to altitude in deceased Peruvians with diabetes mellitus.**

**S6 table. Full regression analysis of death from COVID-19 as the underlying cause according to altitude in deceased Peruvians with diabetes mellitus each 100 m a.s.l**

**S7 table. Full regression analysis of death from COVID-19 as the underlying cause according to altitude in deceased Peruvians with diabetes mellitus each 250 m a.s.l**

**S8 table. Full regression analysis of death from COVID-19 as the underlying cause according to altitude in deceased Peruvians with diabetes mellitus each 500 m a.s.l**

**S9 table. Full regression analysis of death from COVID-19 as the underlying cause according to altitude in deceased Peruvians with diabetes mellitus each 1000 m a.s.l**



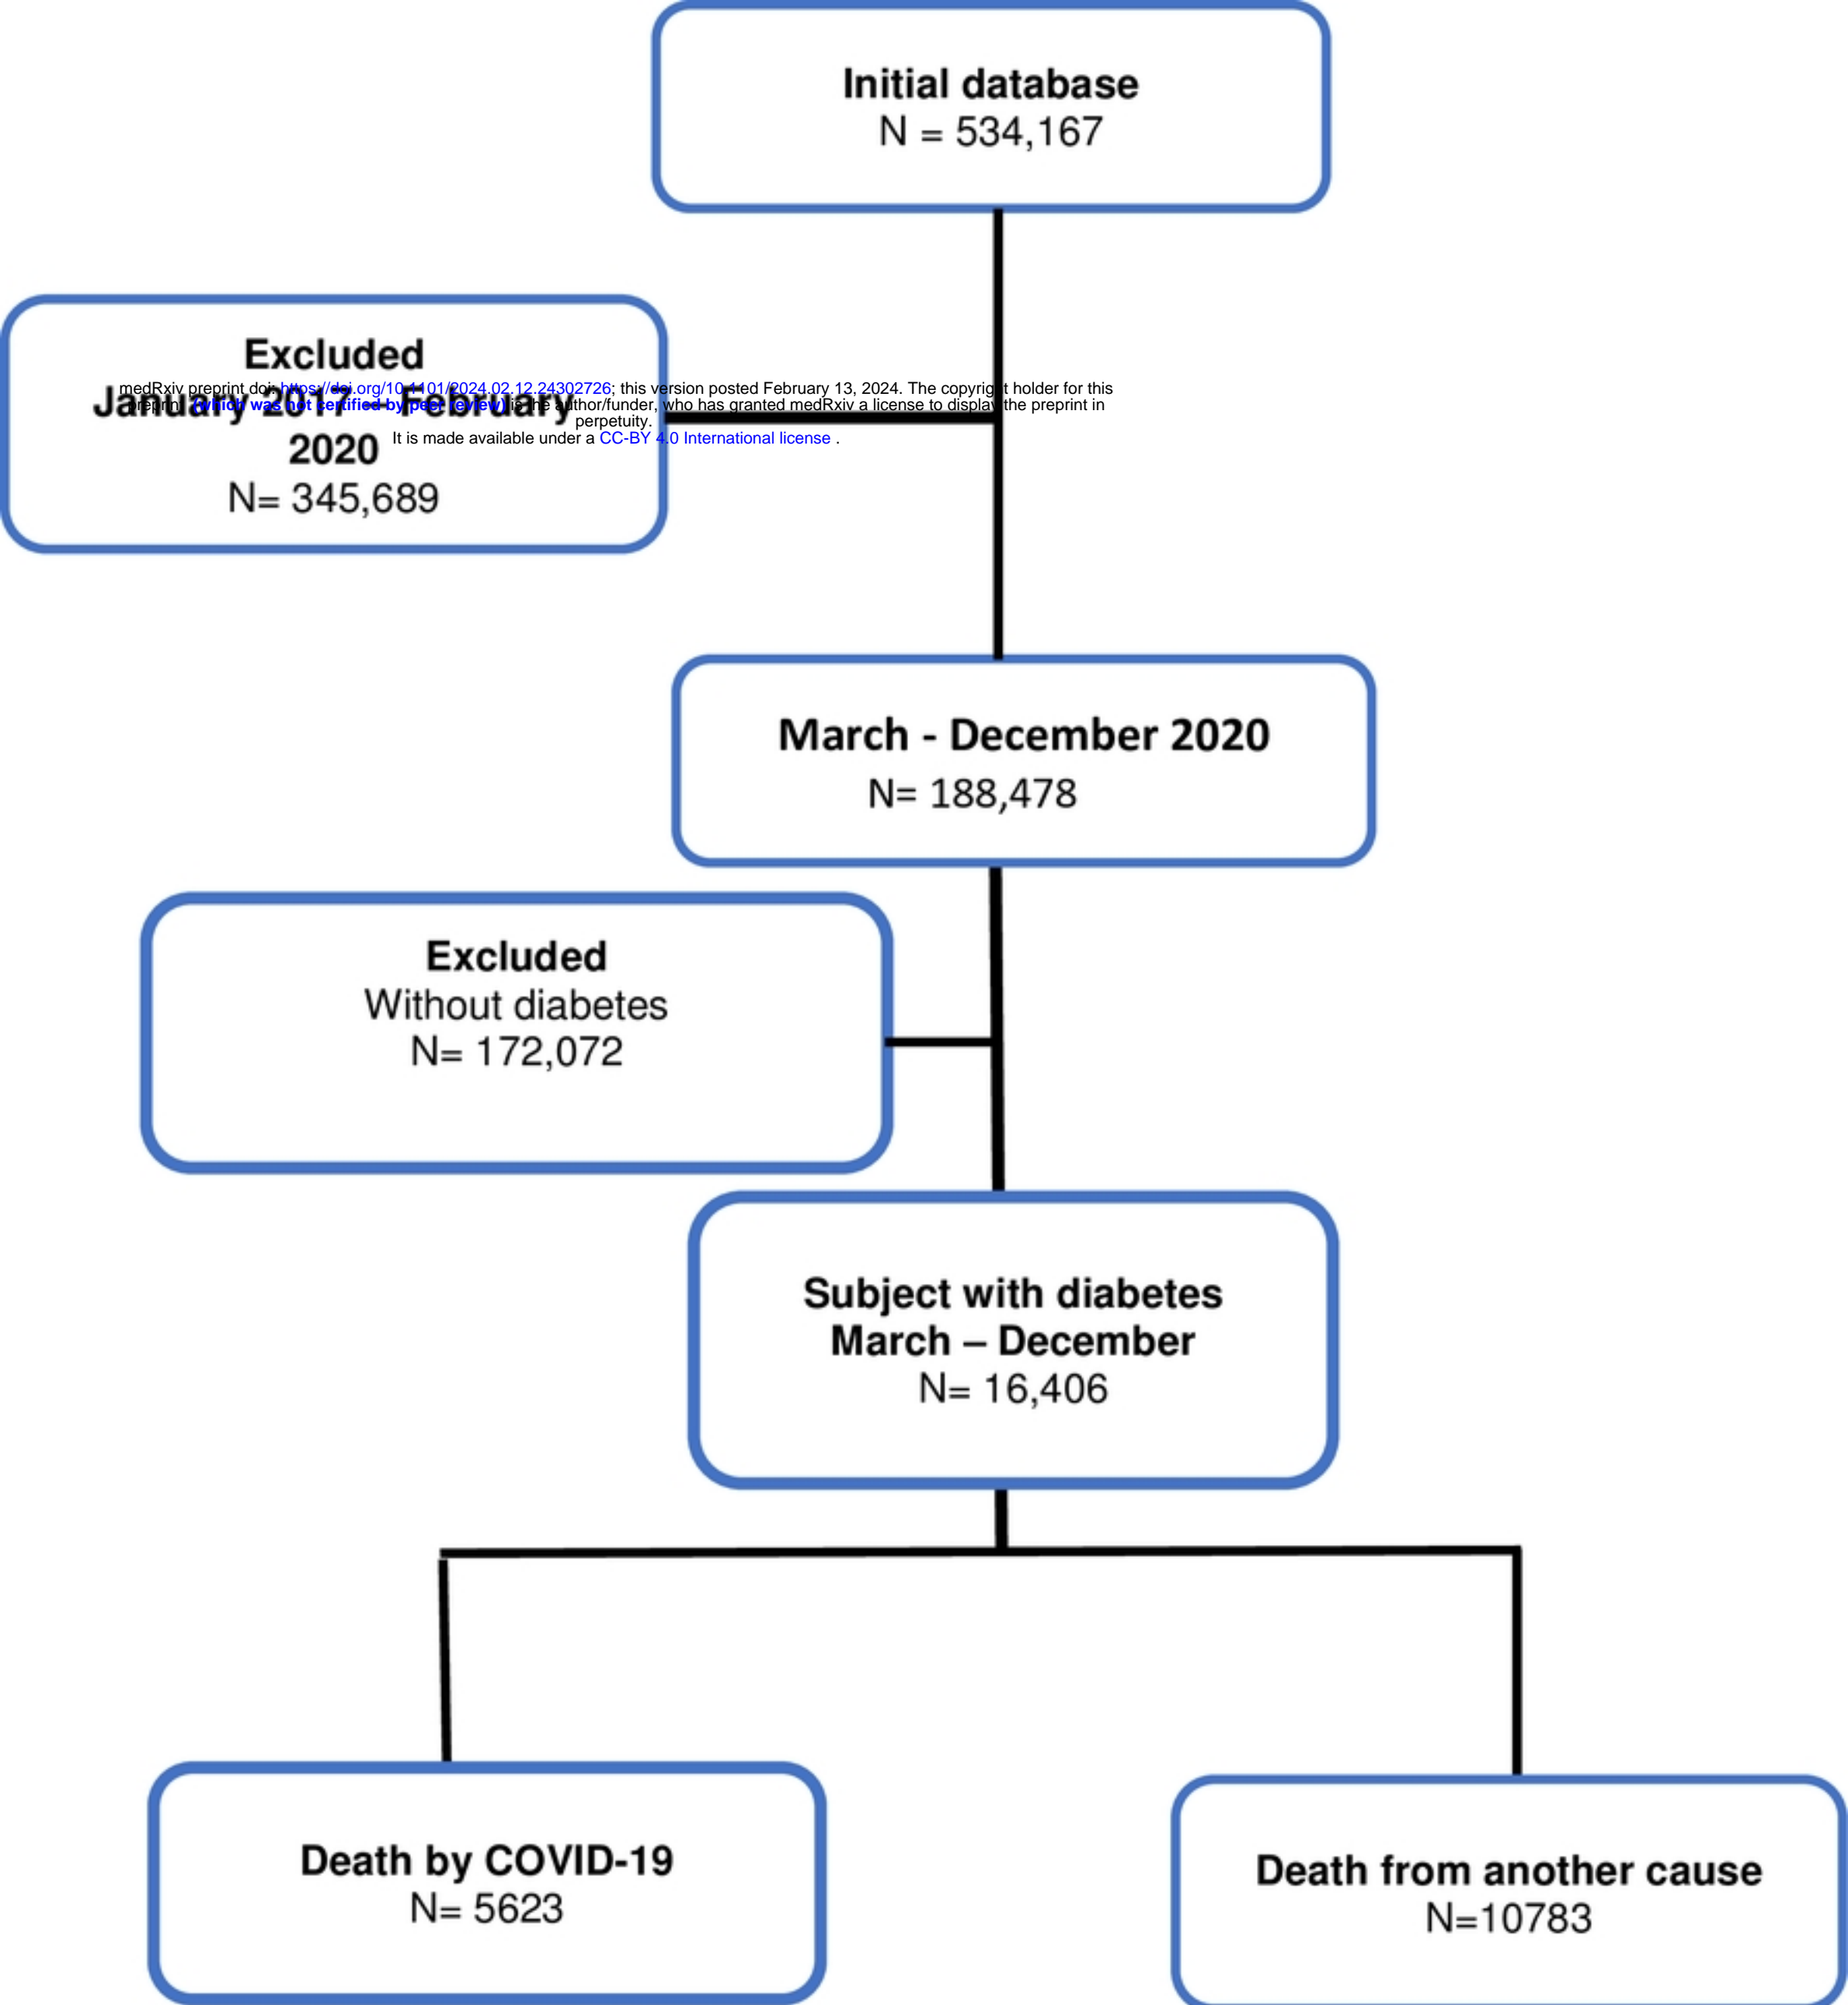

Figure 1
